### Abstract

**Motivation:** Visualizing BAM and VCF files is a common task for biologists, but they're missing a way to filter and to explore the details of each short-read or variation.

**Results:** In that context, we wrote an interactive java-based interface named *JfxNgs* that uses javascript snippets to filter and reformat BAM and VCF files.

**Availability:** <https://github.com/lindenb/jvarkit/blob/master/docs/JfxNgs.md>

**Contact:** pierre.lindenbaum@univ-nantes.fr.

# JfxNgs : A BAM/VCF viewer with javascript-based filtering/reformatting functionalities.

Pierre Lindenbaum (i), Matilde Karakachoff (ii), and Richard  
Redon (i)

(i) L'Institut du thorax, INSERM, CNRS, UNIV Nantes  
8 quai Moncousu, 44000 Nantes, France.

(ii) L'Institut du thorax, INSERM, CNRS, UNIV Nantes, CHU  
Nantes  
8 quai Moncousu, 44000 Nantes, France.  
[pierre.lindenbaum@univ-nantes.fr](mailto:pierre.lindenbaum@univ-nantes.fr)

March 2017

## 1 Description

Powerful tools like the *Integrative Genomics Viewer (IGV)* (Thorvalds *et al.*, 2013) are very efficient at visualizing the features laying in a genomic region but they're not really suitable for exploring the details of each item (quality, functional annotations, ... ). Biologists in our lab currently explore the VCF files using *knime4bio* (Lindenbaum *et al.*, 2011), a plugin we developed for the *knime* platform. But by breaking the VCF structure into a table, we lose important informations like the VCF header, and we cannot use the existing programming interfaces like the '*java API for high-throughput sequencing data formats*' (*htsjdk*) (*htsjdk*, 2016) to analyze the data. Hence, we have written '*JfxNgs*' a java heavy client displaying the items of some VCF and BAM files. Nevertheless we do not see *JfxNgs* as a competitor of *IGV* but rather like a companion that will be used to get the details of each record in the file.

We have taken advantage that the standard edition of 'java' distributed by Oracle contains '*nashorn*', an embedded javascript engine. This engine gives the ability to manipulate java objects using simple javascript statements. When those objects are created by *htsjdk* (*htsjdk*, 2016), it gives the users a very simple way to filter or reformat a VCF or a BAM file. We had previously implemented this idea in the tools *FilterVcf* and *FilterSamReads* from the *picard* (Picard, 2017) suite and in *jvarkit* (Lindenbaum, 2015), and we have now implemented it in the *JfxNgs* interface (Fig. 1 and 2).

```
function myfilter(vc) {
  var countDP = 0;
  for(var i = 0; i < vc.getNSamples() ;++i) {
    var genotype = vc.getGenotype(i);
    if( ! genotype.hasDP() ) continue;
    var dp = genotype.getDP();
    if( dp >= 200 ) continue;
    if( ++countDP >= 2 ) return true;
  }
  return false;
}
myfilter( variant );
```

Figure 1: A simple javascript-based filter retaining the variants having at least two genotypes with a depth lower than 200 reads: an instance of the htsjdk java class `htsjdk.variant.variantcontext.VariantContext` named `'variant'` is injected in the javascript context, the function `'myfilter'` is invoked. It runs a loop over all the samples and count the number of genotypes having a depth ('DP') lower than 200.

```
while( iter.hasNext() ) {
  var samread = iter.next();
  if( samread.getReadUnmappedFlag() ) continue;
  out.println( samread.getContig() + "\t" +
    (samread.getStart()-1) + "\t" +
    samread.getEnd() );
}
```

Figure 2: Reformating a BAM file to a BED file. An iterator named `'iter'`, and scanning some instances of the htsjdk java class `htsjdk.samtools.SAMRecord`, is injected in the javascript context. As long as we can read a SAM record, mapped on the reference, its' genomic location is printed to `'out'`, the current output stream.

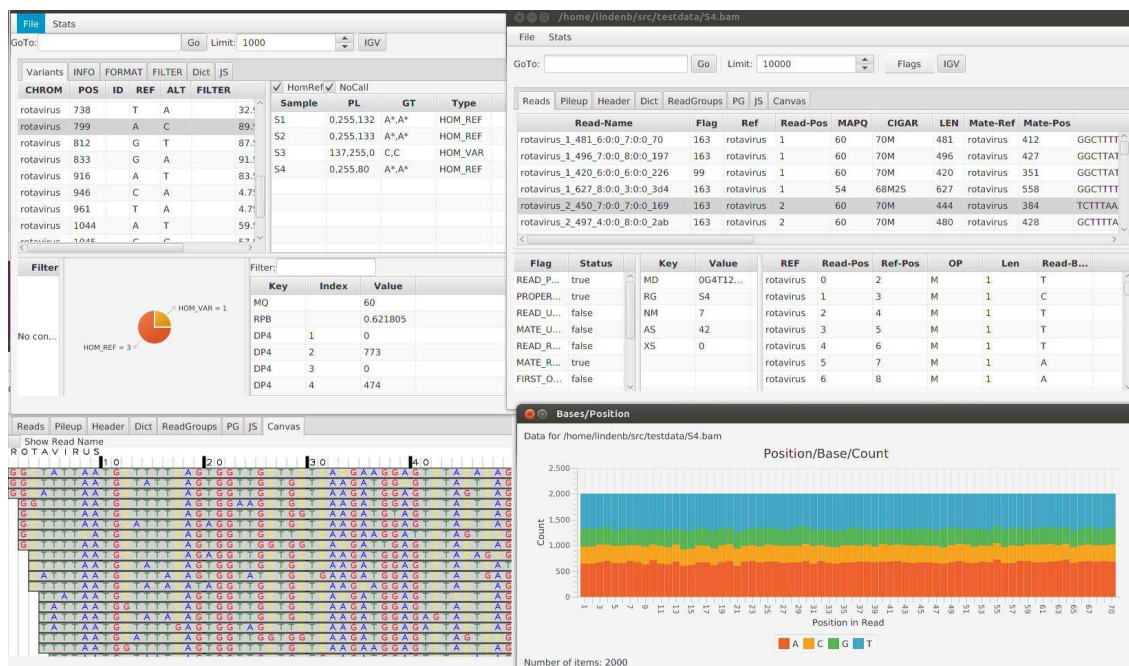

Figure 3: A Screen of jfxngs with a VCF and a BAM window. The 'JS' tabs provide a text area to write a javascript code to filter the data.

*JfxNgs* can read local files as long as they've been indexed with tabix or tribble. It can also access the remote files if the hosting server supports 'Byte-Range' requests. The main window provides tools for indexing BAM and VCF files. The VCF and the BAM windows have common functionalities: filtering the data with javascript, displaying the data in a very simple genome browser, viewing the selected item in a web browser for a common database like Exac (Song *et al.*, 2015), displaying simple statistics (Fig. 3), exporting the data with javascript, viewing the current selected genomic interval in *IGV*, viewing the components of the file header, saving the filtered data in a new file. The javascript areas contain a growing library of code snippets to help the user.

The BAM window shows the standard columns of the BAM specification (Read-Name, Sam-Flags, etc...), it provides some tables to view the details of the cigar string, the sam flags, the supplementary alignments. A pileup-like table displays the bases covering each position.

The VCF window displays the standard columns of a VCF file (CHROM, POS, etc...) , it provides some tables to clearly view the INFO, FILTER, ALTS data. If the annotations of a prediction algorithm like VEP (McLaren *et al.*, 2010) or SNPEff (Cingolani *et al.*, 2012) are detected, the predictions for each transcripts are displayed in a new table. A table of each genotypes displays the calls for each variant with the ability to filter out the Hom-Ref and No-Call genotypes. A pedigree file can be associated to a VCF and is then used to detect the Mendelian incompatibilities.

## 2 Availability

The software is available in the *jvarkit* package (Lindenbaum, 2015). It has been tested under Linux, Windows and MacOS and is freely available at <https://github.com/lindenb/jvarkit/blob/master>. At the time of writing, our tool is also available, packaged as a java webstart application, at [http://redonlab.univ-nantes.fr/public\\_html/jnlp/jfxngs](http://redonlab.univ-nantes.fr/public_html/jnlp/jfxngs), meaning that it doesn't require any installation but java and an always up-to-date application is downloaded each time the user invokes it.

## Acknowledgements

We want to thank the bioinformatics core facility of Nantes (Biogenouest) for technical support.

## Funding

This work was supported by the Institut National de la Santé et de la Recherche Médicale (INSERM).

## References

- Cingolani, P., Platts, A., Wang, l. e. L., Coon, M., Nguyen, T., Wang, L., Land, S. J., Lu, X., and Ruden, D. M. (2012). A program for annotating and predicting the effects of single nucleotide polymorphisms, SnpEff: SNPs in the genome of *Drosophila melanogaster* strain w1118; iso-2; iso-3. *Fly (Austin)*, **6**(2), 80–92.
- htsjdk (2016). A java api for high-throughput sequencing data. <https://github.com/samtools/htsjdk>. [Online; accessed 17-Mar-2017].
- Lindenbaum, P. (2015). Jvarkit: java-based utilities for Bioinformatics.
- Lindenbaum, P., Le Scouarnec, S., Portero, V., and Redon, R. (2011). Knime4Bio: a set of custom nodes for the interpretation of next-generation sequencing data with KNIME. *Bioinformatics*, **27**(22), 3200–3201.
- McLaren, W., Pritchard, B., Rios, D., Chen, Y., Flicek, P., and Cunningham, F. (2010). Deriving the consequences of genomic variants with the Ensembl API and SNP Effect Predictor. *Bioinformatics*, **26**(16), 2069–2070.
- Picard (2017). Picard: A set of command line tools (in Java) for manipulating high-throughput sequencing (HTS) data and formats. [Online; accessed 16-Mar-2017].
- Song, W., Gardner, S. A., Hovhannisyan, H., Natalizio, A., Weymouth, K. S., Chen, W., Thibodeau, I., Bogdanova, E., Letovsky, S., Willis, A., and Nagan, N. (2015). Exploring the landscape of pathogenic genetic variation in the ExAC population database: insights of relevance to variant classification. *Genet. Med.*
- Thorvalds, H., Robinson, J. T., and Mesirov, J. P. (2013). Integrative Genomics Viewer (IGV): high-performance genomics data visualization and exploration. *Brief. Bioinformatics*, **14**(2), 178–192.
